# Supplementary material for: Super-High Magnification Dermoscopy in 190 Clinically Atypical Pigmented Lesions
Source: MDPI journal article supplement (doi:10.3390/diagnostics13132238), 2023-06-30
Supplement: s1 [file s1]

|                                                                  | Nevi      |            |            |        | Melanoma  |            |            |          |
|------------------------------------------------------------------|-----------|------------|------------|--------|-----------|------------|------------|----------|
|                                                                  | Trunk     | Upper limb | Lower limb | pvalue | Trunk     | Upper limb | Lower limb | pvalue   |
| n                                                                | 68        | 25         | 18         |        | 36        | 15         | 17         | 0.637    |
| cells presence                                                   | 67(98.5%) | 23(92.0%)  | 17(94.4%)  | 0.290  | 35(97.2%) | 15(100.0%) | 17(100.0%) | 0.975    |
| Cell presence: Keratinocytes                                     | 66(97.1%) | 22(88.0%)  | 15(83.3%)  | 0.077  | 32(88.9%) | 13(86.7%)  | 15(88.2%)  | 0.070    |
| Cell presence: Roundsh melanocytes                               | 23(33.8%) | 7(28.0%)   | 4(22.2%)   | 0.605  | 15(41.7%) | 5(33.3%)   | 12(70.6%)  | 0.002a,c |
| Cell presence: Dendrititic melanocytes                           | 11(16.2%) | 5(20.0%)   | 3(16.7%)   | 0.909  | 9(25.0%)  | 10(66.7%)  | 2(11.8%)   | 0.299    |
| Cell presence: Large polimorfous cellules violet (melanophages%) | 13(19.1%) | 4(16.0%)   | 2(11.1%)   | 0.715  | 7(19.4%)  | 6(40.0%)   | 4(23.5%)   | 0.345    |
| Cell irregularity in shape and size (only for melanocytes%)      | 12(17.6%) | 5(20.0%)   | 4(22.2%)   | 0.896  | 15(41.7%) | 9(60.0%)   | 10(58.8%)  | 0.331    |
| Cell color: black                                                | 8(11.8%)  | 2(8.0%)    | 2(11.1%)   | 0.873  | 2(5.6%)   | 1(6.7%)    | 3(17.6%)   | 0.869    |
| Cell color: brown                                                | 65(95.6%) | 21(84.0%)  | 16(88.9%)  | 0.169  | 33(91.7%) | 14(93.3%)  | 15(88.2%)  | 0.246    |
| Cell color: violet/blue                                          | 26(38.2%) | 13(52.0%)  | 5(27.8%)   | 0.258  | 11(30.6%) | 7(46.7%)   | 9(52.9%)   | 0.644    |
| Cell distribution: irregular arrangement (only for melanocytes%) | 11(16.2%) | 6(24.0%)   | 2(11.1%)   | 0.513  | 12(33.3%) | 7(46.7%)   | 7(41.2%)   | 0.403    |
| Roundish nests (ex globules%)                                    | 24(35.3%) | 9(36.0%)   | 8(44.4%)   | 0.770  | 8(22.2%)  | 6(40.0%)   | 4(23.5%)   | 0.564    |
| out of focus bluish structureless areas                          | 19(27.9%) | 11(44.0%)  | 5(27.8%)   | 0.313  | 13(36.1%) | 6(40.0%)   | 4(23.5%)   | 0.248    |
| out of focus gray/brown structureless areas                      | 12(17.6%) | 2(8.0%)    | 7(38.9%)   | 0.035c | 5(13.9%)  | 4(26.7%)   | 1(5.9%)    | 0.466    |
| vessels                                                          | 19(27.9%) | 4(16.0%)   | 3(16.7%)   | 0.368  | 14(38.9%) | 4(26.7%)   | 4(23.5%)   | 0.584    |
| network with edged papillae                                      | 18(26.5%) | 6(24.0%)   | 6(33.3%)   | 0.783  | 2(5.6%)   | 1(6.7%)    | 0(0.0%)    | 0.186    |
| network without edged papillae                                   | 9(13.2%)  | 6(24.0%)   | 3(16.7%)   | 0.458  | 8(22.2%)  | 7(46.7%)   | 4(23.5%)   | 0.129    |
| angulated nest                                                   | 5(7.4%)   | 2(8.0%)    | 2(11.1%)   | 0.874  | 12(33.3%) | 2(13.3%)   | 2(11.8%)   | 0.637    |
